# Supplementary material for: Receptor-like kinase BAM1 facilitates early movement of the Tobacco mosaic virus
Source: PubMed Central journal article supplement (PMC8087827; doi:10.1038/s42003-021-02041-0), 2021-04-30
Supplement: 42003_2021_2041_MOESM1_ESM.pdf [file 42003_2021_2041_MOESM1_ESM.pdf]

## Supplementary Information

### Supplementary Methods

#### Cloning of RdRp domains and CP for the BiFC and Y2H assays

TMV RdRp is large and contains four main domains<sup>1</sup>, methyltransferase (MT), nonconserved region I (NSI), nonconserved II (NSII), and helicase (HL). Coding sequences of each of these RdRP domains and CP were amplified from pTRBO-G (#80083, Addgene) using pfu ultra II DNA polymerase (#600674, Agilent) and primers listed in Table S1, and cloned into pDONR207 (#12213013, Invitrogen) by the BP reaction using Gateway BP Clonase II (#11789100, Invitrogen). These entry clones in pDONR207 were transferred to the corresponding destination vectors for use in the BiFC and Y2H assays by the LR reaction using Gateway LR Clonase II (#11791020, Invitrogen).

#### Construction of BAM1 mutants for the BiFC assay

DNA sequences of BAM1 coding for amino acid residues 1 to 622 (LRR), 623 to 1003 (TM-KD), and 678 to 974 (KD) were amplified using pfu ultra II DNA polymerase (#600674, Agilent) and primers listed in Table S1. The PCR products were cloned into pDONR207 (#12213013, Invitrogen) by the BP reaction using Gateway BP Clonase II (#11789100, Invitrogen) and transferred into the destination vector pGTQL1211YN (#61704, Addgene) by the LR reaction using Gateway LR Clonase II (#11791020, Invitrogen).

#### Cell-free phosphorylation assays

Cell wall-enriched fractions was purified from 2 g of fully-expanded leaves of *N.*

*benthamiana* 2 weeks after TRV inoculation, when the highest silencing effect is observed, as described <sup>2</sup>, resuspended in 2 ml of buffer H (0.1M HEPES pH 7.4, 10 mM EDTA, 5 mM DTT, 1 mM PMSF), and used in the cell-free phosphorylation assay of TMV MP as described <sup>2</sup>. Briefly, 25- $\mu$ l aliquots of cell wall fraction preparation, containing ca. 10  $\mu$ g protein in buffer H, were mixed with 5  $\mu$ l 10x kinase buffer (0.2 M HEPES pH 7.4, 50 mM MgCl<sub>2</sub>, 0.5 M KCl) and 10  $\mu$ l buffer H containing 1.0  $\mu$ g of purified TMV MP, and the reactions were initiated by addition of 10  $\mu$ l 100 mM ATP, followed by incubation for 15 min at 25°C. The reaction was stopped by addition of 50  $\mu$ l SDS-polyacrylamide gel electrophoresis (SDS-PAGE) 2X loading buffer and boiling for 5 min. The 20- $\mu$ l aliquots of the reaction mixtures were resolved by SDS-PAGE and, followed by staining with the Pro-Q diamond phosphoprotein gel stain (#P33301, Invitrogen) as described by the manufacturer. The total protein in the phosphostained gel was detected by subsequent staining with Coomassie brilliant blue. Protein band images were recorded using a Gel Doc XR+ gel documentation system (#170,8185, Bio-Rad).

**Table S1. Primers used for DNA amplification, molecular cloning, and detection**

| No. | Primer name       | Sequence (5' to 3')                                          | Purpose                                              |
|-----|-------------------|--------------------------------------------------------------|------------------------------------------------------|
| 1   | attB1-PAPK1 Fw    | ggggacaagtttgtaaaaaagcaggctcaatg<br>acttgaaaatggataatgttattg | Cloning of papk1 from<br><i>arabidopsis thaliana</i> |
| 2   | attB2-PAPK1 Rv    | ggggaccactttgtacaagaaagctgggtgtttgcg<br>gatcgaaaagaagctc     | As above                                             |
| 3   | attB1-TMV MP Fw   | ggggacaagtttgtaaaaaagcaggctcaatg<br>ctctagttgttaaaggaaaagtg  | Cloning of tmv mp                                    |
| 4   | attB2-TMV MP Rv   | ggggaccactttgtacaagaaagctgggtgaaacg<br>aatccgattcggcga       | As above                                             |
| 5   | attB1-TMV MT Fw   | ggggacaagtttgtaaaaaagca<br>ggctcaatggcatacacacagacagctac     | Cloning of TMV RdRP methyl<br>transferase domain     |
| 6   | attB2-TMV MT Rv   | ggggaccactttgtacaagaaagctgg<br>gtggtaaacctctctattagaggccgg   | As above                                             |
| 7   | attB1-TMV NSI Fw  | ggggacaagtttgtaaaaaagca<br>ggctcaatgaaggagtttttagtcaccaga    | Cloning of TMV RdRP non-<br>structure domain 1       |
| 8   | attB2-TMV NSI Rv  | ggggaccactttgtacaagaaagctgg<br>gtgggacaaggattgtaacaaagatttgt | As above                                             |
| 9   | attB1-TMV NSII Fw | ggggacaagtttgtaaaaaagca<br>ggctcaatgacgttttacctgcataactaagc  | Cloning of TMV RdRP non-<br>structure domain 2       |
| 10  | attB2-TMV NSII Rv | ggggaccactttgtacaagaaagctgg<br>gtggtcggataaacaacagactcagagc  | As above                                             |
| 11  | attB1-TMV HL Fw   | ggggacaagtttgtaaaaaagca<br>ggctcaatggcgaaactcagaactctgcg     | Cloning of TMV RdRP helicase<br>domain               |
| 12  | attB2-TMV HL Rv   | ggggaccactttgtacaagaaagctgg<br>gtgttggttcctgcatcgaccttatac   | As above                                             |
| 13  | attB1-TMV CP Fw   | ggggacaagtttgtaaaaaagcaggctcaatgt<br>cttacagtatcactactccatc  | Cloning of TMV CP                                    |
| 14  | attB2-TMV CP Rv   | ggggaccactttgtacaagaaagctgggtgagttgc<br>aggaccagaggtcc       | As above                                             |
| 15  | attB1-PDLP5 Fw    | ggggacaagtttgtaaaaaagcaggctcaatga<br>tcaagacaaagacgacgctc    | Cloning of PDLP5 from <i>A.</i><br><i>thaliana</i>   |

---

|    |                 |                                                               |                                                                                                                 |
|----|-----------------|---------------------------------------------------------------|-----------------------------------------------------------------------------------------------------------------|
| 16 | attB2-PDLP5 Rv  | ggggaccactttgtacaagaaagctgggtgtttaca<br>ccatttctcatcttgaatttc | As above                                                                                                        |
| 17 | attB1-PIP2A Fw  | ggggacaagtttgtacaaaaagca<br>ggctcaatggcaaggatgtggaagc         | Cloning of PIP2A from <i>A. thaliana</i>                                                                        |
| 18 | attB2-PIP2A Rv  | ggggaccactttgtacaagaaagctgg<br>gtggacgttggcagcacttctga        | As above                                                                                                        |
| 19 | AttL1           | tcgcttaacgctagcatggatctc                                      | Confirmative PCR and sequencing of entry clones                                                                 |
| 20 | AttL2           | gtaacatcagagatttgagacac                                       | As above                                                                                                        |
| 21 | BAM1 1436 Fw    | ccggcgttcagaaacttcttc                                         | Sequencing of BAM1                                                                                              |
| 22 | BAM1 1511 Rv    | tgctgaagcttccctacctc                                          | As above                                                                                                        |
| 23 | AttB1 Fw        | ggggacaagttgtac aaaaagcaggct                                  | Confirmative PCR and sequencing of destination clones                                                           |
| 24 | AttB2 Rv        | ggggaccactttgta caagaaagctgggt                                | As above                                                                                                        |
| 25 | 35S Promoter Fw | ctatccttcgaagacccttc                                          | Confirmative PCR of destination binary vector                                                                   |
| 26 | GFP 86 Rv       | ctgaacttgtagccgtttacgt                                        | Confirmative PCR of BiFC vector with nYFP                                                                       |
| 27 | GFP 604 Rv      | ggtagtggttgcgggcag                                            | Confirmative PCR of BiFC vector with cYFP                                                                       |
| 28 | BAM1 5'S        | gtctaacaacatgttcaccgg                                         | Genotyping PCR of Arabidopsis <i>bam1-3</i> mutant line, gene-specific                                          |
| 29 | BAM1 3'I        | gagagctcgtttctgctcagatca                                      | As above                                                                                                        |
| 30 | LBa1            | atggttcacgtagtgggcatc                                         | Genotyping PCR of Arabidopsis <i>bam1-3</i> mutant line, Ti-DNA-specific                                        |
| 31 | Actin2 1093 Fw  | gtggtcgtacaaccgtatt                                           | Reference for RT-qPCR of transcripts in Arabidopsis, span exon-exon boundary to avoid genomic DNA contamination |

---

---

|    |                     |                                                           |                                                                                                                |
|----|---------------------|-----------------------------------------------------------|----------------------------------------------------------------------------------------------------------------|
| 32 | Actin2 1288 Rv      | cacgtccagcaaggtcaaga                                      | Reference for RT-qPCR of transcripts in Arabidopsis                                                            |
| 33 | BAM1 2583 Fw        | cggctacatagctccagagtat                                    | RT-qPCR of BAM1 transcripts in <i>A. thaliana</i> , span exon-exon boundary to avoid genomic DNA contamination |
| 34 | BAM1 2681 Rv        | cttccggtgacgagttccaa                                      | RT-qPCR of BAM1 transcripts in <i>A. thaliana</i> , specific for BAM1 but not for BAM2 or BAM3                 |
| 35 | AttB1 NbBAM1 Fw     | ggggacaagtttgtaaaaaagcaggctcaatgc<br>gtcttcttctccccttattc | Cloning of <i>NbBAM1</i> from <i>Nicotiana benthamiana</i>                                                     |
| 36 | AttB2 NbBAM1 Rv     | ggggaccactttgtacaagaaagctgggtggatgct<br>gagtaggtcaggtggag | As above                                                                                                       |
| 37 | NbBAM1 1456 Fw      | gggaacaaattttcggggcg                                      | Sequencing of <i>NbBAM1</i>                                                                                    |
| 38 | NbBAM1 1556 Rv      | ggcacaatgggtccagagaa                                      | As above                                                                                                       |
| 39 | NbBAM1 989 MluI Fw  | gcacgcgtgggacttgctgagctagag                               | Cloning a 0.7 kb fragment of <i>NbBAM1</i> into pTRV2                                                          |
| 40 | NbBAM1 1704 MluI Rv | gcacgcgtagggcaggaataactcccaa                              | As above                                                                                                       |
| 41 | GusA 969 MluI Fw    | gcacgcgtcaactcctaccgtacctcgc                              | Cloning a 0.7 kb fragment of <i>GusA</i> into pTRV2, used as negative control                                  |
| 42 | GusA 1668 MluI Rv   | gcacgcgtggtcgcaaaatcggcgaaat                              | As above                                                                                                       |
| 43 | NbPDS 1005 MluI Fw  | cgacgcgtgagtcaaaaggtggccaagtca                            | Cloning a 0.7 kb fragment of PDS from <i>N. benthamiana</i> into pTRV2, used as positive control               |
| 44 | NbPDS 1726 MluI Rv  | cgacgcgtacatcttctggctccggccaag                            | As above                                                                                                       |
| 45 | NbPP2A 1690 Fw      | gaccctgatgttgatgttcgct                                    | Reference for RT-qPCR of transcripts in <i>N. benthamiana</i>                                                  |
| 46 | NbPP2A 1812 Rv      | gagggattgaagagagatttc                                     | As above                                                                                                       |
| 47 | NbBAM1 1767 Fw      | ccgggtactgggcagtttag                                      | RT-qPCR of BAM1 transcripts in <i>N. benthamiana</i>                                                           |
| 48 | NbBAM1 1901 Rv      | aaagctcctcgttggtgagg                                      | As above                                                                                                       |

---

---

|    |                     |                                                                |                                                                                                        |
|----|---------------------|----------------------------------------------------------------|--------------------------------------------------------------------------------------------------------|
| 49 | TMV MP 552 Fw       | agggcccatggaacttacag                                           | RT-qPCR of TMV RNA, specific for TMV MP                                                                |
| 50 | TMV MP 670 Rv       | tccctttgcggacatcactc                                           | As above                                                                                               |
| 51 | TrfA 987 Fw         | taccgctcaagctggaaac                                            | Construction of pTRBO-CP-G                                                                             |
| 52 | TMGMV-Hmz Fw        | cggccacctaggcggatgtgtttccgggctga                               | As above                                                                                               |
| 53 | TMGMV-Hmz Rv        | acatccgcctaggtggccgctaccgcggttag                               | As above                                                                                               |
| 54 | TMV 6192 NotI Fw    | aaactagggcggccggtagtagcaagatgcataat<br>aaataacgg               | As above                                                                                               |
| 55 | AttB2 LRR Rv        | ggggaccactttgtacaagaaagctgggtggtcgac<br>taccgtctttacaaggaccaag | Used together with primer no. 1 for amplification of LRR from amino acid 1 to 622                      |
| 56 | AttB1 TM-KD Fw      | ggggacaagtttgtaaaaaagcaggctcaatgg<br>ttgctaaaggaggtcaccagag    | Used together with primer no. 2 for amplification of TM-KD from amino acid 623 to 1003                 |
| 57 | BAM1-stop-spacer Rv | gtacaatacgattactttctgttcgatcatagattgag<br>tagatccggcgg         | Used together with primer no. 2 for amplification of BAM1 or TM-KD for fusion PCR to linker and GST-MP |
| 58 | AttB1 KD Fw         | ggggacaagtttgtaaaaaagcaggctcaacag<br>ctttccagagactagac         | Amplification of KD for fusion PCR to linker and GST or GST-MP                                         |
| 59 | KD-stop-spacer Rv   | gtacaatacgattactttctgttcgatcacgaggtg<br>gcaacttcgggat          | As above                                                                                               |
| 60 | pDUET spacer Fw     | tcgaacagaaagtaatcgtattgtac                                     | Amplification of linker for fusion PCRs to generate dual expression constructs                         |
| 61 | pDUET spacer Rv     | catatgtatatctccttcttataactaac                                  | As above                                                                                               |
| 62 | Spacer-GST Fw       | gtaagtataagaaggagatatacatatgtccccta<br>tactagttattgg           | Amplify GST for fusion PCRs to generate dual expression constructs                                     |
| 63 | Factor Xa site Rv   | acgaccttcgatcagatccga                                          | As above                                                                                               |
| 64 | Xa-TMV MP Fw        | atcggatctgatcgaaggtcgtgctctagttgtaaa<br>ggaaaagtg              | Used together with primer no. 4 for amplification TMV MP for fusion of GST and MP                      |

---

**Table S2.** Pearson's correlation coefficients of YFP and CFP signals generated from 30 regions of interest (ROI) using ImageJ software

| No. | PDLP5 | PIP2A | Free CFP |
|-----|-------|-------|----------|
| 1   | 0.59  | 0.46  | 0.03     |
| 2   | 0.53  | 0.51  | 0.02     |
| 3   | 0.67  | 0.7   | 0.11     |
| 4   | 0.71  | 0.54  | 0.14     |
| 5   | 0.67  | 0.69  | 0        |
| 6   | 0.61  | 0.71  | -0.01    |
| 7   | 0.74  | 0.61  | 0.24     |
| 8   | 0.73  | 0.55  | 0.3      |
| 9   | 0.76  | 0.44  | 0        |
| 10  | 0.63  | 0.48  | 0.03     |
| 11  | 0.77  | 0.54  | 0        |
| 12  | 0.87  | 0.46  | 0.06     |
| 13  | 0.77  | 0.61  | 0        |
| 14  | 0.7   | 0.65  | -0.09    |
| 15  | 0.8   | 0.44  | 0.1      |
| 16  | 0.79  | 0.51  | 0        |
| 17  | 0.69  | 0.7   | 0        |
| 18  | 0.72  | 0.7   | 0        |
| 19  | 0.75  | 0.71  | 0.3      |
| 20  | 0.73  | 0.77  | -0.14    |
| 21  | 0.7   | 0.87  | 0        |
| 22  | 0.71  | 0.83  | 0.28     |
| 23  | 0.67  | 0.64  | 0        |
| 24  | 0.75  | 0.53  | 0.37     |
| 25  | 0.7   | 0.56  | 0.3      |
| 26  | 0.77  | 0.63  | 0.14     |
| 27  | 0.73  | 0.44  | 0.04     |
| 28  | 0.81  | 0.48  | 0.06     |
| 29  | 0.84  | 0.42  | 0.39     |
| 30  | 0.71  | 0.52  | 0.14     |

**Table S3.** Relative expression levels of *BAM1* (a) and relative levels of TMV genomic RNA (b) in systemic leaves of the wild type, the gain-of-function (*35S:BAM1*), and loss-of-function *Arabidopsis* Col-0 lines (*bam1-3*) 6 and 13 days post inoculation.

**a**

| No. | Expression level at 6dpi |                 |               | Expression level at 13dpi |                 |               |
|-----|--------------------------|-----------------|---------------|---------------------------|-----------------|---------------|
|     | WT                       | <i>35S:BAM1</i> | <i>bam1-3</i> | WT                        | <i>35S:BAM1</i> | <i>bam1-3</i> |
| 1   | 1.10                     | 58.48           | 0.09          | 0.69                      | 0.983417        | 0.190732      |
| 2   | 0.725426                 | 1.968922401     | 0.096254856   | 1.798427                  | 1.777006        | 0.299598      |
| 3   | 1.360656                 | 3.17213991      | 0.044828963   | 1.559648                  | 3.56088         | 0.421899      |
| 4   | 1.11751                  | 1.889143299     | 0.131077587   | 2.251947                  | 2.780348        | 0.351781      |
| 5   | 0.624192                 | 2.968018611     | 0.055891954   | 1.097857                  | 3.307641        | 0.245459      |
| 6   | 1.320969                 | 5.05116414      | 0.046649736   | 0.442347                  | 1.357674        | 0.511733      |

**b**

| No. | TMV level at 6dpi |                 |               | TMV level at 13dpi |                 |               |
|-----|-------------------|-----------------|---------------|--------------------|-----------------|---------------|
|     | WT                | <i>35S:BAM1</i> | <i>bam1-3</i> | WT                 | <i>35S:BAM1</i> | <i>bam1-3</i> |
| 1   | 0.396611          | 0.09906406      | 0.151186956   | 994.9718           | 949.8765        | 444.4098      |
| 2   | 0.035518          | 35.46663762     | 0.095352291   | 587.9482           | 581.6253        | 114.7064      |
| 3   | 0.823259          | 0.099124295     | 0.06402059    | 1495.011           | 1277.98         | 266.1414      |
| 4   | 8.330317          | 459.0470316     | 0.060610337   | 450.5282           | 916.6367        | 462.1419      |
| 5   | 9.264448          | 0.459548291     | 0.184247063   | 1360.622           | 159.5464        | 503.6862      |
| 6   | 1.117296          | 0.088766912     | 0.21091557    | 1418.675           | 505.9933        | 522.2082      |

**Table S4.** Relative expression levels of *BAM2* (a) and relative levels of TMV genomic RNA (b) in systemic leaves of the wild type and loss-of-function *Arabidopsis* Ler-0 line (*bam2-3*) 6 days post inoculation.

| No. | Expression levels |                 | No. | TMV levels |                 |
|-----|-------------------|-----------------|-----|------------|-----------------|
|     | Ler WT            | Ler <i>bam2</i> |     | Ler WT     | Ler <i>bam2</i> |
| 1   | 0.490112          | 0.10583         | 1   | 0.00082    | 0.000139        |
| 2   | 1.46768           | 0.13282         | 2   | 0.000429   | 0.00027         |
| 3   | 1.080487          | 0.095444        | 3   | 1.604181   | 0.000373        |
| 4   | 1.038265          | 0.184844        | 4   | 0.001      | 0.000517        |
| 5   | 1.239212          | 0.120335        | 5   | 3.393297   | 2.158627        |



**Table S5.** Effect of VIGS of *NbBAM1* on cell-to-cell movement of TMV MP. **a** expression levels of *NbBAM1* in *PDS*- and *NbBAM1*-silenced *N. benthamiana* plants 2 weeks after treatment with TRV vectors. **b** Percentage of moved cells (>1 cell / cluster) of TMV MP in *NbBAM1*-silenced *N. benthamiana* plants 60 and 72 hours post inoculation. **c** The extent of MP-CFP cell-to-cell movement was scored as frequency of cell clusters containing the CFP signal and composed of 2 or 3 cells/cluster.

**a**

| No. | Fold change |          |          |
|-----|-------------|----------|----------|
|     | Healthy     | TRV-gus  | TRV-bam1 |
| 1   | 0.988329    | 0.55442  | 0.106108 |
| 2   | 0.884456    | 0.932088 | 0.147466 |
| 3   | 1.14399     | 1.244736 | 0.119917 |

**b**

| No.      | Percentage of moved cells (>1 cell / cluster) |          |          |          |          |          |
|----------|-----------------------------------------------|----------|----------|----------|----------|----------|
|          | 60 hpi                                        |          |          | 72 hpi   |          |          |
|          | 1                                             | 2        | 3        | 1        | 2        | 3        |
| Healthy  | 48.3871                                       | 43.33333 | 51.42857 | 48.48485 | 45.45455 | 59.375   |
| TRV-gus  | 52.17391                                      | 53.84615 | 45.71429 | 61.36364 | 53.48837 | 50       |
| TRV-bam1 | 30.43478                                      | 36.17021 | 37.2093  | 45.94595 | 48.27586 | 43.33333 |

**c**

| No.    |                | Percentage of cells |         |         |         |         |         |          |         |         |
|--------|----------------|---------------------|---------|---------|---------|---------|---------|----------|---------|---------|
|        |                | Healthy             |         |         | Vector  |         |         | Silenced |         |         |
|        |                | 1                   | 2       | 3       | 1       | 2       | 3       | 1        | 2       | 3       |
| 60 hpi | 2-cell cluster | 38.7                | 30      | 42.8571 | 39.1304 | 38.4615 | 34.2857 | 28.2608  | 34.0425 | 32.5581 |
|        | 3-cell cluster | 9.67                | 13.3333 | 8.57142 | 13.0434 | 15.3846 | 11.4285 | 2.17391  | 2.12766 | 4.65116 |
| 72 hpi | 2-cell cluster | 39.3                | 39.3939 | 43.75   | 40.9090 | 41.8604 | 40      | 40.5405  | 37.9310 | 40      |
|        | 3-cell cluster | 9.09                | 6.06060 | 15.625  | 20.4545 | 11.6279 | 10      | 5.40540  | 10.3448 | 3.33333 |

**Table S6.** Size of infection loci of TMV without (a) and with CP (b)

**a**

| No. | Diameter ( $\mu\text{m}$ ) of GFP expressing infection loci |          |         |          |
|-----|-------------------------------------------------------------|----------|---------|----------|
|     | 2dpi                                                        |          | 3dpi    |          |
|     | TRV-gus                                                     | TRV-bam1 | TRV-gus | TRV-bam1 |
| 1   | 290                                                         | 190      | 350     | 260      |
| 2   | 280                                                         | 110      | 450     | 400      |
| 3   | 310                                                         | 170      | 400     | 250      |
| 4   | 255                                                         | 210      | 420     | 270      |
| 5   | 260                                                         | 150      | 345     | 255      |
| 6   | 220                                                         | 100      | 355     | 200      |
| 7   | 200                                                         | 120      | 340     | 245      |
| 8   | 275                                                         | 100      | 360     | 195      |
| 9   | 265                                                         | 195      | 255     | 150      |
| 10  | 200                                                         | 150      | 245     | 205      |
| 11  | 240                                                         | 205      | 205     | 150      |
| 12  | 220                                                         | 155      | 335     | 105      |
| 13  | 250                                                         | 100      | 310     | 95       |
| 14  | 285                                                         | 120      | 270     | 110      |
| 15  | 270                                                         | 115      | 370     | 120      |

**b**

| No. | Size (mm) |          | No. | Size (mm) |          | No. | Size (mm) |          |
|-----|-----------|----------|-----|-----------|----------|-----|-----------|----------|
|     | TRV-gus   | TRV-bam1 |     | TRV-gus   | TRV-bam1 |     | TRV-gus   | TRV-bam1 |
| 1   | 0.486     | 0.555    | 26  | 0.519     | 0.618    | 51  | 0.665     | 0.412    |
| 2   | 0.734     | 0.335    | 27  | 0.617     | 0.458    | 52  | 0.666     | 0.510    |
| 3   | 0.336     | 1.266    | 28  | 0.814     | 1.027    | 53  | 0.708     | 0.378    |
| 4   | 0.507     | 0.320    | 29  | 0.990     | 0.436    | 54  | 0.428     | 0.433    |
| 5   | 0.837     | 0.830    | 30  | 0.777     | 0.407    | 55  | 0.729     | 0.571    |
| 6   | 0.850     | 0.795    | 31  | 1.028     | 0.372    | 56  | 1.038     | 0.554    |
| 7   | 0.709     | 0.636    | 32  | 1.061     | 0.491    | 57  | 0.874     | 0.478    |
| 8   | 0.731     | 0.331    | 33  | 0.744     | 0.659    | 58  | 0.779     | 0.852    |
| 9   | 0.596     | 0.495    | 34  | 0.695     | 0.490    | 59  | 0.757     | 0.427    |
| 10  | 0.880     | 0.600    | 35  | 0.718     | 0.646    | 60  | 0.684     | 0.320    |
| 11  | 0.560     | 0.447    | 36  | 0.849     | 0.342    | 61  | 0.588     | 0.572    |
| 12  | 0.598     | 0.463    | 37  | 1.168     | 0.351    | 62  | 0.917     | 0.541    |
| 13  | 0.704     | 0.863    | 38  | 0.767     | 0.677    | 63  | 0.756     | 0.340    |
| 14  | 0.763     | 0.549    | 39  | 0.651     | 0.320    | 64  | 0.739     | 0.563    |
| 15  | 0.730     | 0.710    | 40  | 0.892     | 0.661    | 65  | 0.372     | 0.758    |
| 16  | 0.846     | 0.387    | 41  | 0.650     | 0.662    | 66  | 0.672     | 0.320    |
| 17  | 0.580     | 0.346    | 42  | 0.895     | 0.839    | 67  | 0.688     | 0.581    |
| 18  | 0.391     | 0.310    | 43  | 0.582     | 0.477    | 68  | 0.747     | 0.331    |
| 19  | 0.332     | 0.344    | 44  | 0.786     | 1.141    | 69  | 0.894     | 0.402    |
| 20  | 0.630     | 0.410    | 45  | 0.881     | 0.913    | 70  | 0.461     | 0.544    |
| 21  | 0.776     | 0.810    | 46  | 0.794     | 0.874    | 71  | 0.443     | 0.393    |
| 22  | 0.771     | 0.378    | 47  | 0.774     | 0.414    | 72  | 1.000     | 0.402    |
| 23  | 0.471     | 0.351    | 48  | 0.800     | 0.327    | 73  | 1.072     | 0.320    |
| 24  | 0.788     | 0.412    | 49  | 0.649     | 0.379    | 74  | 0.724     | 0.445    |
| 25  | 0.638     | 0.465    | 50  | 0.720     | 0.926    | 75  | 1.177     | 0.561    |

**a**

```

1 ATGGCTCTCTCTCCCTTATCTTCTTCTTATCTTCTTACTCTACTCTTACCGCCGTAAGAACCCCGATACAGAAATCCAGGCTTCTGCTCTAAAACCTGCATTACCGAGCCACAGTACTGCTCATGGAGCATCTCA 160
161 CTAGTCACTGCTTGTGGAGGGTGTCACTGGAGACATATGTCAGTCACTCTCTGATCTCAAGTCAATGTACCGCGAGCTTCCCGCGAAGTTGGAAATCTCGTTCTTCAAAAATCTCCCTGCTCCCTTAACGAGTTACCGGGCC 320
321 CATTCCCGGGTAAATCTGTTATCTCGGATCTTCACTTAACTCTTCAATAGCATCTTCAAGATAGGATTTCCCTCTCAGTTAAAGCTCCTGACATTAAGCAACAGCATCCGGGCTCCCTCCCTGACGCTG 480
481 TATCAGATGACTAATTAAGACACCTCCACTCCGGGGGAATTTTCCGGGGGAGTCCGGGGAGTATGAGAAATCCAGTCTCTAGATCTCTGAGTTCGGGCAAGGATTCGGGCAAGGATTCGGGGAATACACAGAGATAGGAACATCACCAGCC 640
641 TTCAGGATGTATGATAGGTTACTACACACTCTCCGGGGATCCCGCGGAAATAGGAGCACTTACACAGCTGTATGATGATGCTGCTTAACTGCTGACCTTCGGGAGGATTCAGCGGAAATAGGGAAGCTTCAGAACCTTGATCTTTT 800
801 CTTAAGTGAATCTCTACTGGGCTTTAACTCCGGGATAGTACTCTTAGAGCTTAAATCTTATGATCTCAATAGCATCTCTCCGGGAAATCCCGCGGCAATTCGGGATCTTAAAGATCTCACTCTTTGAATCTTTCCGGAAAG 960
961 CTTCCGCTGATCAATCCGGGCTGCTGAGTACAGGATATGCACTATGGGAAACAAATTTACTGGAAGCTTCCAGGATCCAGGATTCAGGCAACAGTAAAGCTCAAAAATCTTATGCTCAAGTCCAAATAGTGGAAATTCAC 1120
1121 CCCCAGAACTGTCCGGGGTAAAAATTCAGACAAATATCACTCTGGGACTCTTGTGGGCAATCTGATCTTGGGGATGTGATCACTAGTTCGGATAGAAATGGGGGAATATCTGAATGCTCAATCCAAAAGGGCTCTTAAG 1280
1281 CTTCCAGAGCTCTCAGAACTGACTCAGAAATCTCTCACTGCTGATTTCTGAGACTAAATCATATCTCAAGTCTTGGACAGATAAGCTTCCAAATACACCTAAGCTTCCGCACTAGACTTGGAACTTTCTGGAGTCTCA 1440
1441 AAATCTCTCTCGATGAAATTTCCGGGGGATTCAGCTGAAATAGGAAAGCTCAGCAGCTATCAAAATGATTTAGTCAAGACAGATTTCTCGAGCCATTCGGGAGATAGCAATGCAATGCTAATCTATGTTATCTCAGCA 1600
1601 CAGACCACTTTGGGTGAGATTCCTACTGATCAGAGTATGAGGATCACTCACTTCACTTAAAGAAACCACTAGTGGGATATCTCGCCCTATCTGATGATGAGAGTCACTTCTGTTGATTTTCAATAAAGCACTTTCTGTG 1760
1761 TTTAGTCCGGGCTAGCCAGTTAGTATTTCAATACACTCATTCTGGGAAATCAGACTTTTCCGGCCCTATTTGGGGCTGCAAGAGGGTGTGTTGATGGGGTATGCACTCACCAGGAGGCTTTATGGCTCCATGAGCTT 1920
1921 TTAATGTTATGTTGTTCTGCTGCTATTTGTTCTGCTGCTTAAAGAGCCGATTTAAAGAGGCGAATGAGGCTGCTGCTGGAAGCTCAGCTTCCAGGCTTGGATTTTCACTGATGATTTTGGACACTTGAAG 2080
2081 AGGATAACATATGTTGAAAGAGGCTGCTGATGCTCAAGAGGGGTAATGCCAGTGGGAAATGTTGCTGCTTAAAGGTTCCAGCTATGAGCAGGGTTCCTCTCATGATCATGGGTTCAATGAGATACAGACTTTGGAGATCAGACA 2240
2241 CAGGCACTTTAGGTTTACTGAGATTTCTGCAATCATGAGACAAATCTATGTTTATGAGTACAGCTTAAATGGGAAATGCTTATGGGCAAGAGGCGCTCATTACATGGGATACAGGATTAAGATGAGGATGAGGCTCA 2400
2401 AAGGGCTTTGCTATCTCATCAGACTGCTGCTCTTGAATCTGATGCTGATGAAATCAAGCAATATCTGCTGACTCAACTTGAAGCTCATGTTGCTGATTTGACTTCTGAGTCTTCCAGAGTTCAGGAGACTCAGAACTGATCTG 2560
2561 CATTCTGGTCTTATGTTGATCTGCTCAGAAATGCTTACAGCTGAGGTTGATGAGAGAGTGTGCTATATAGCTTTGGTGGTGTATTAGAATGGTAAAGTGGCAAAAGCCAGTGGAGAGTTGGTACGGTGTGATAGTCAAGT 2720
2721 GCTTAGGAAATAGCTACAGGATAAGGATGCTCTCAGACTCTGACCAAGCTCTCAAGACTCTCAAGGCTTAAAGGATGATGATGCTTCAATGCTGCAATGTTGTGATGAGAGGAGGCTGGGAGCCAGCTAGGAGTATG 2880
2881 CAAATACTAAGTACGCTTCCAAACACCAGGTTCAAAATCAGGTGACTCAAGCTCAGCTGAGTGGCTCACCATCAGCAGCTTGCATATAGATCCCAACCTCAGCTCCGGGTAGACAAAGACACATCAGCAACCTCAATCACTCC 3040
3041 CTGACTACTCAGCATCTGA 3060

```

**b**

```

← SP → ← LRR →
AtBAM1 1 --MKLFLLLL FLHSHSFT ASRP-ISEFR ALLSLKSLT GAGDKNRPL SSKVSTFC TWIGTCDVS 67
NbBAM1 1 MLL.L.P.I.V.L.M.FT.FTA GKE.R.P.YQ ...A..AI. ....PQLA. A..NI...H.S.K....RY 67
AtBAM1 68 RSHVSLDLS GINLSQSLP DVSHLLQLN LSLAENLISG DIPPEISLS GLRHLNLSNN VFNQSPDEI 137
NbBAM1 68 .....I..P.VT.S.P.E.GN..F...V.L.QFT. ...G..FIP.N.HY.....I.SIG...PQL 136
AtBAM1 138 SSGLVNLSLV DVYNNLFGD LPVSVNLVQ LRLHLGNY FAKIIPSYG SWPVYELAV SGNELVKPI 207
NbBAM1 137 TR..R..K..I...M...D.YQM.N .....F.G.R...E.. RQFQF.....E.. 205
AtBAM1 208 FEIGNLTLTA ELVIGYNAF EDGLPFEIGN LSELVFDGA NGLLGRIFP EIGKLQKLDY LFLQVNFSG 277
NbBAM1 208 .....I..H..V...T.SG.I.....Q.....A.....S...A 275
AtBAM1 278 FPLWELTSL SILKMSLNSN MFTGIPSAF ARLNHLNLL LFNKLNRIE FEFIGLPEL FVGLMENNPF 347
NbBAM1 276 S..P.I...K....L.....LS..M.PT..D.....S...D..... 345
AtBAM1 348 FGSIPKQLR NCKLNLDLS SSKLTGTFPP NMCSONKLET LYLGNLFG SIFDGLQCE SLTRINGRN 417
NbBAM1 348 .....S.G..T.S..KNI.....N...A.N.Q.I..... 415
AtBAM1 418 FINGRIFPLG FGLPKQVE LQNYLAGEI PVAGVSVNL QGISLNNQL SGLPFAIGN FTQVQKLLD 487
NbBAM1 416 .....L.S..Q.S...N.L.T.YF..STKSI.TS. ....T...TB...A..... 485
AtBAM1 488 GKKVQGLPS EVKIQQLSK IDFSHNLFSG RIAPFISCK LTFVPLSRN ELSEIPNEI TAMKILNIN 557
NbBAM1 486 .....S..R..A..I.....D...P.V...K.....Y..... 555
AtBAM1 558 LSRNHLVSI PGISMSQSL TSLDFSTNLS SGLVPTQGF SYFNYSPLG NFDLQGYLG PKDQVAKGG 627
NbBAM1 556 .....AP.....V.....F..... 625
AtBAM1 628 IQSHKQPLS ASMKLLVLG LLVCSIAFAV VALFKASLK KASERAMKL TAPQLDFTC DWDLSLQED 697
NbBAM1 626 S.P.QR.A..P.....I.....V...A.....A..K..... 695
AtBAM1 698 NIIGQGAGI VYKVMNGD LVAVKPLAAM SRSISHBGF NAIQTLSKI RIRHIVKLLG FCSNHETNL 767
NbBAM1 696 .....S.E.H.....P..... 765
AtBAM1 768 VYEMPNGLS GEVLHGKGG HLDNTRYKI ALAAKGLCY LHDHCPILV HRDVSNNIL LSNPEARVA 837
NbBAM1 766 .....M.....V.....L..... 835
AtBAM1 838 DFULAKFLQD SGTSEMSAI AGSYGIAPE YATTLKVEEK SDVYSFQVL LELVGRKPV GEFQGDVLD 907
NbBAM1 836 .....GK..G...I.....TV.LN..M..... 905
AtBAM1 908 QNVVMDENL KDSVLKLPD RLSSPIHEV TRVTFVAMLC VEKQVEMPT MREYVQLTE IKPLPDKD- 976
NbBAM1 906 .....GK..G...I.....TV.LN..M..... 974
AtBAM1 976 -----QP MTEAPASEL SPK-----SQQSFPD LLNL 1003
NbBAM1 976 DSTVTEFSL SAA..L..PT..APGYTKDRH QPTQRP.....SI 1019

```

SP, signal peptide; LRR, leucine rich repeats; TM: transmembrane domain; KD, kinase domain

**c**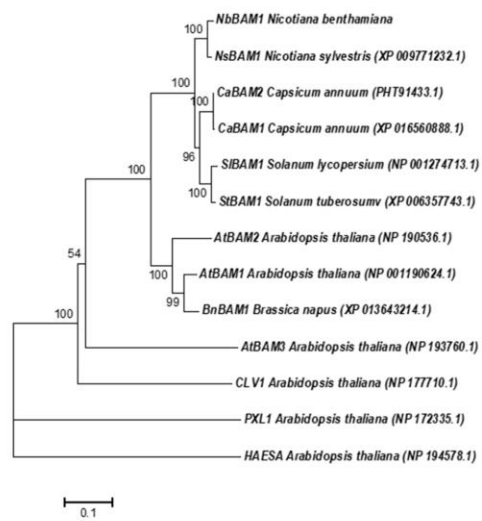

**Figure S1. BAM1 homolog of *N. benthamiana*.** **a** Amino acid sequence alignment of BAM1 proteins from *A. thaliana* (AtBAM1) and *N. benthamiana* (NbBAM1). The amino acid sequence of NbBAM1 was aligned with that of AtBAM1 (NP001190624.1) using ClustalX (ver. 2.1) (<http://www.clustal.org/clustal2/>). Arrows delineate the following indicated domains: SP, signal peptide; LRR, leucine-rich repeats; TM, transmembrane domain; KD, protein kinase domain. Identical amino acids are indicated by periods. **b** Nucleotide sequence of the *NbBAM1* cDNA. **c** Phylogenetic tree of BAM1 homologs from different plant species. NtBAM1 is indicated by asterisk. The evolutionary history was inferred using the Neighbor-Joining method<sup>3</sup>. The optimal tree with the sum of

branch length of 2.3252050 is shown. The percentage of replicate trees in which the associated taxa clustered together in the bootstrap test (1,000 replicates) are shown next to the branches <sup>4</sup>. The tree is drawn to scale, with branch lengths in the same units as those of the evolutionary distances used to infer the phylogenetic tree. The evolutionary distances were computed using the Poisson correction method <sup>5</sup> and are in the units of the number of amino acid substitutions per site. The analysis involved 13 amino acid sequences. All positions containing gaps and missing data were eliminated. There were 940 positions in the final dataset. Evolutionary analyses were conducted using the Molecular Evolutionary Genetics Analysis tool (MEGA, version 6.0.5 for Mac OS) (<http://www.megasoftware.net>) <sup>6</sup>, which also generated this description of the analysis. Scale bar, 0.1 amino acid substitutions per site.

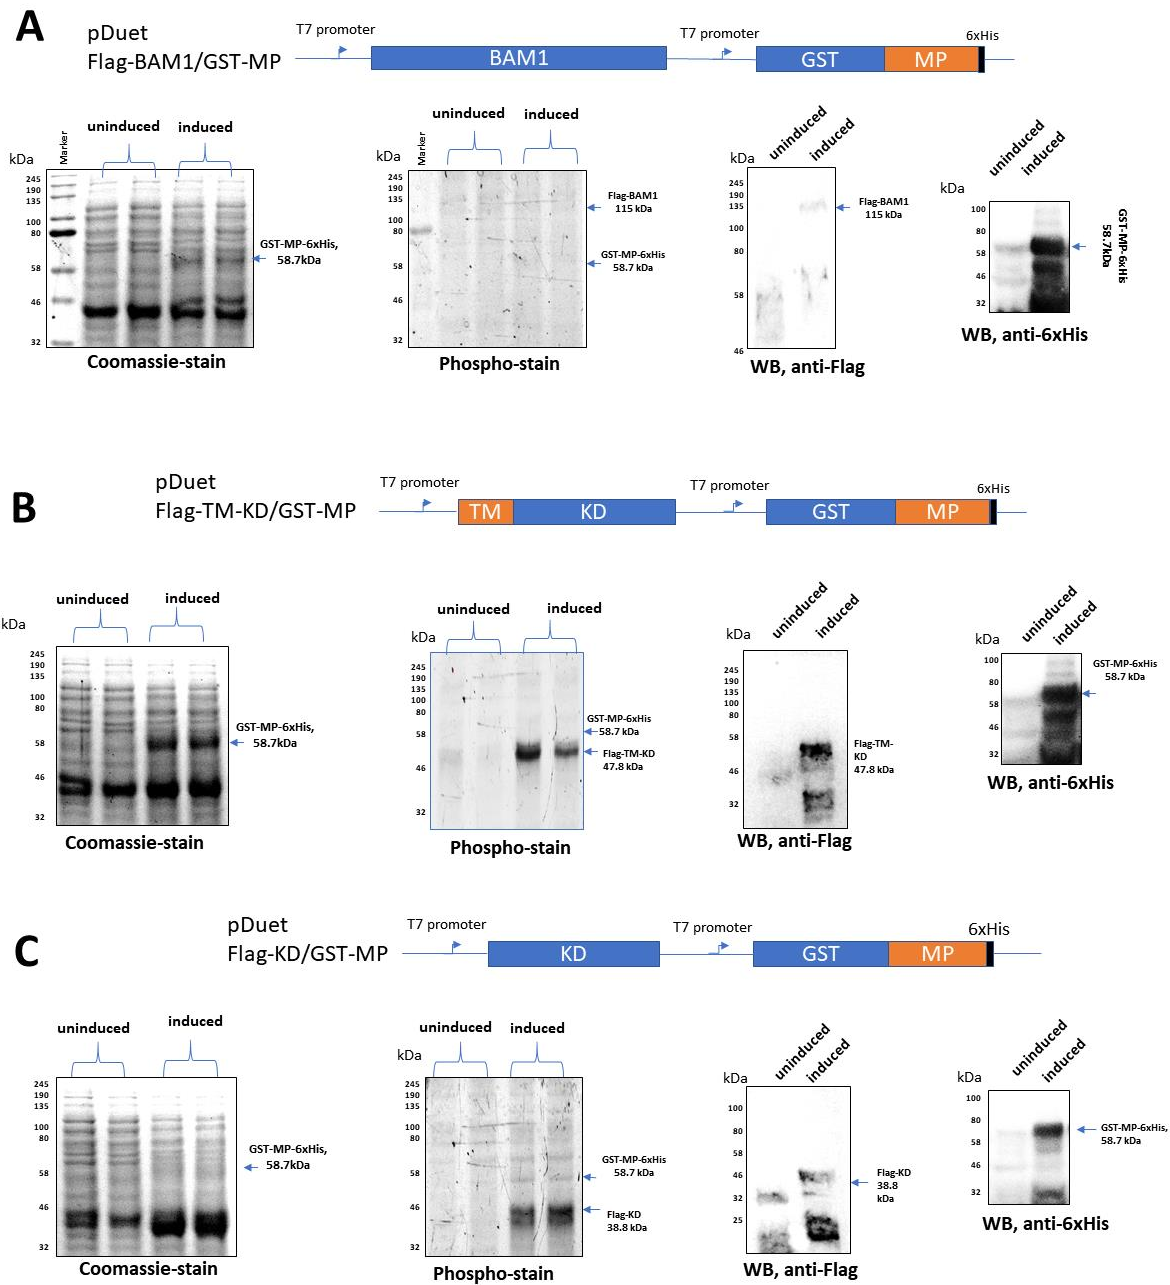

**Figure S2. Phosphorylation of GST-MP in *Escherichia coli*.** Transphosphorylation assay was conducted under dual expression of (a) BAM1 and GST-MP, (b) BAM1 TM-KD and GST-MP, or (c) BAM1 KD and GST-MP in *E. coli* Lemo21(DE3). After induction, cell pellet was subjected to SDS-PAGE followed by Coomassie staining or phosphoprotein stain staining, or western blotting with anti-Flag or anti-Histidine antibody.

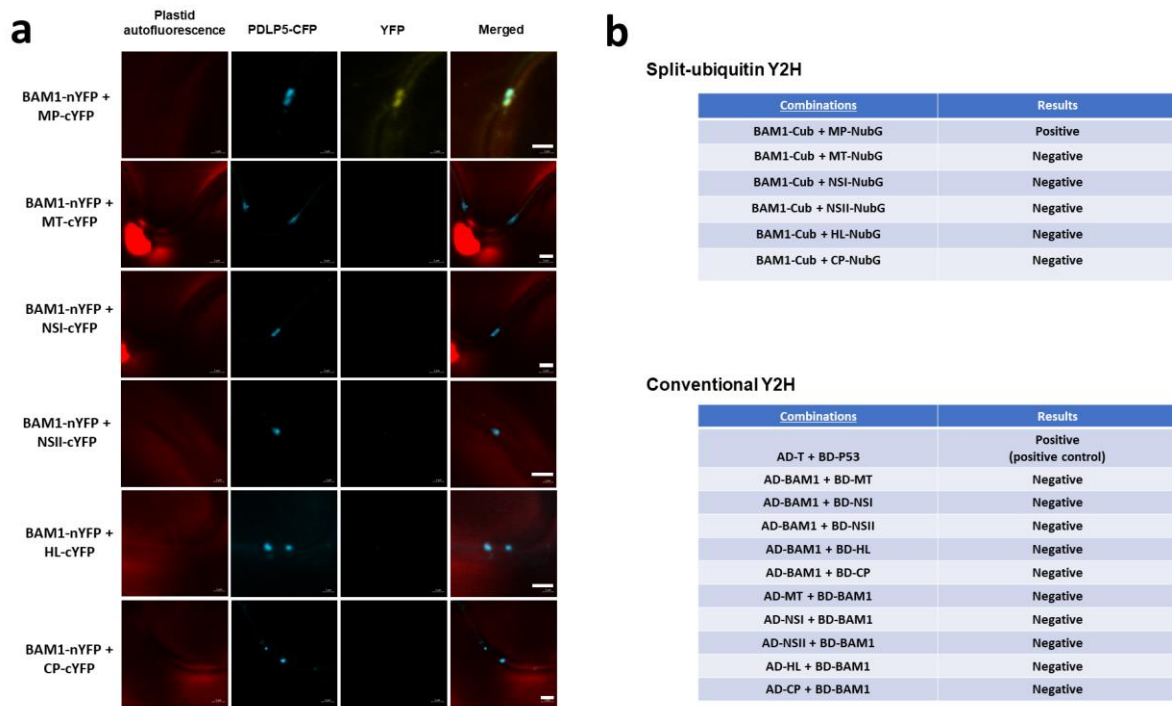

**Figure S3. Lack of interaction between BAM1 and TMV RdRp domains or CP in BiFC and split-ubiquitin Y2H.** **a** Protein interaction was analyzed by BiFC in *N. benthamiana* leaves agroinfiltrated with the indicated combinations (1:1 w/w ratio) of the tested expression constructs and the expression construct for PDLP5-CFP as a PD marker. YFP signal is in yellow; CFP signal is in cyan. Images were recorded 48 h after agroinfiltration and are single confocal sections representative of multiple independent experiments (N=20 images from 5 plants). Scale bars = 2  $\mu$ m. **b** Summarized results of protein interaction analyzed by split-ubiquitin and conventional Y2H assays.

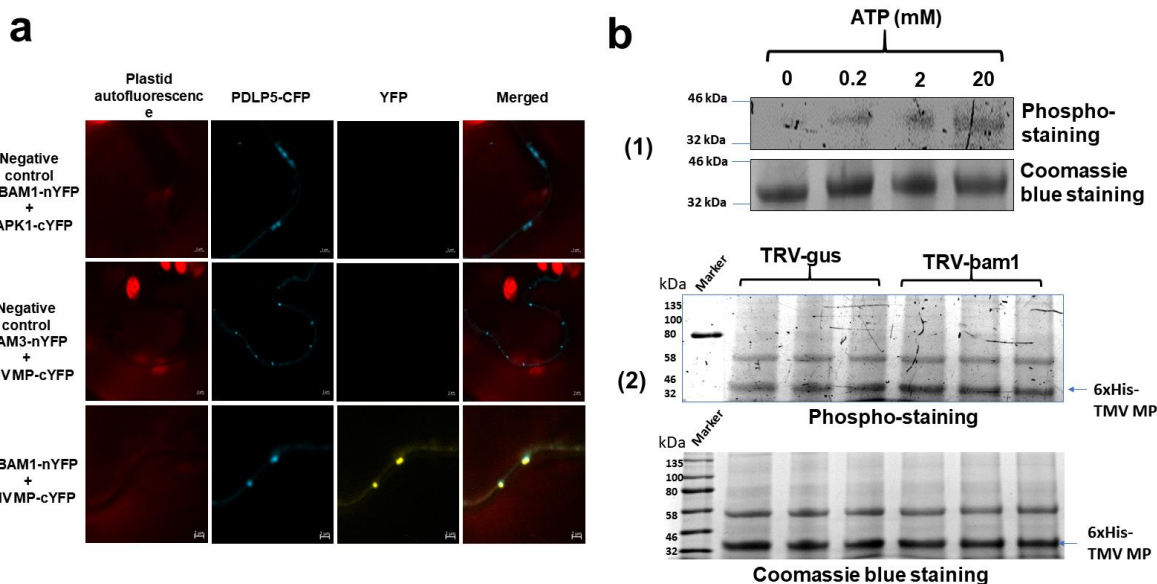

**Figure S4. Interaction of NbBAM1 with TMV MP and TMV MP phosphorylation by cell wall-enriched fractions.** **a** Interaction. Protein interaction was analyzed by BiFC in *N. benthamiana* leaves agroinfiltrated with the indicated combinations (1:1 w/w ratio) of the tested expression constructs and an expression construct for PDL5-CFP as a PD marker. YFP signal is in yellow; CFP signal is in cyan. Images were recorded 48 h after agroinfiltration and are single confocal sections; images are representative of multiple independent experiments (N=20 images from 5 plants). Scale bars = 5  $\mu$ m. **b** Phosphorylation. TMV MP was phosphorylated in a cell-free system using cell wall-enriched fractions of control (TRV-gus) and *NbBAM1*-silenced plants (TRV-bam1). (1) Dose response of TMV MP phosphorylation by TRV-gus to ATP concentration. (2) TMV MP phosphorylation by TRV-gus and TRV-bam1. Triplicate experiments are shown for each condition. The assay was performed in the presence of 20 mM ATP. TMV MP phosphorylation was detected by phosphostaining with the Pro-Q diamond gel stain, and the equal input of TMV MP was verified by Coomassie blue staining.

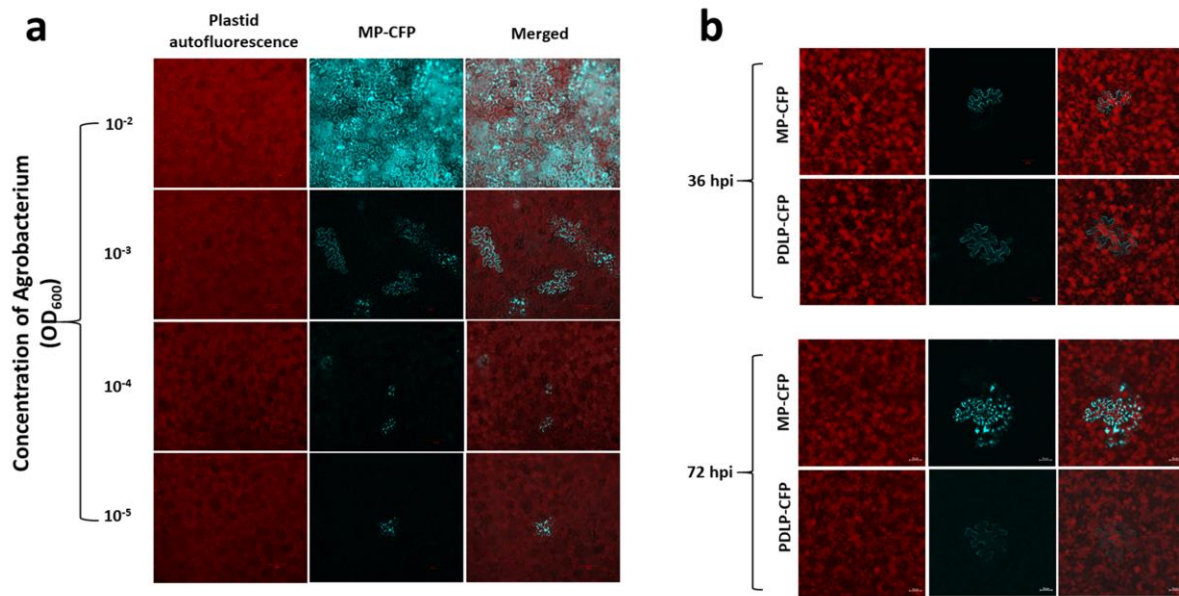

**Figure S5. Calibration of bacterial cell density during agroinfiltration to allow MP-CFP expression in single transformed cells.** **a** Confocal microscopic images of *Nicotiana benthamiana* leaves 48 hours post infiltration (hpi) with serially diluted *Agrobacterium* cell suspensions harboring an MP-CFP-expressing construct. **b** Representative images of single cells (at 36 hpi) and multi-cell clusters (at 72 hpi) that express TMV MP-CFP. PDLP5-CFP was used as negative control that does not move from cell to cell. Images are single confocal sections representative of multiple independent experiments (N=20 images from 5 plants).



## Supplementary References

1. Wang LY, Lin SS, Hung TH, Li TK, Lin NC, Shen TL. Multiple domains of the *Tobacco mosaic virus* p126 protein can independently suppress local and systemic RNA silencing. *Mol Plant-Microbe Interact* **25**, 648-657 (2012).
2. Citovsky V, McLean BG, Zupan J, Zambryski PC. Phosphorylation of tobacco mosaic virus cell-to-cell movement protein by a developmentally-regulated plant cell wall-associated protein kinase. *Genes Dev* **7**, 904-910 (1993).
3. Saitou N, Nei M. The neighbor-joining method: a new method for reconstructing phylogenetic trees. *Mol Biol Evol* **4**, 406-425 (1987).
4. Felsenstein J. Confidence limits on phylogenies: an approach using the bootstrap. *Evolution* **39**, 783-791 (1985).
5. Zuckerkandl E, Pauling L. Evolutionary divergence and convergence in proteins. In: *Evolving Genes and Proteins* (eds Bryson V, Vogel HJ). Academic Press, New York (1965).
6. Tamura K, Stecher G, Peterson D, Filipowski A, Kumar S. MEGA6: Molecular Evolutionary Genetics Analysis version 6.0. *Mol Biol Evol* **30**, 2725-2729 (2013).
